# Supplementary material for: Long‐Term Outcomes Among a Nationwide Cohort of Patients Using an Implantable Cardioverter‐Defibrillator: UMBRELLA Study Final Results
Source: PubMed Central journal article supplement — J Am Heart Assoc. 2020 Dec 25;10(1):e018108. doi: 10.1161/JAHA.120.018108 (PMC7955463; doi:10.1161/jaha.120.018108), 2020-12-25
Supplement: JAH3-10-e018108-s001.pdf [file JAH3-10-e018108-s001.pdf]

# **SUPPLEMENTAL MATERIAL**

**Table S1. Baseline characteristics according to date of ICD implant.**

|                                | 2005-2009       | 2010-2014       | 2015-2017       |
|--------------------------------|-----------------|-----------------|-----------------|
| N (%)                          | 344 (8)         | 2744 (63.9)     | 1208 (28.1)     |
| Age (years), mean ( $\pm$ SD)  | 61.5 $\pm$ 13.7 | 61.9 $\pm$ 13.2 | 62.3 $\pm$ 12.0 |
| Sex (male)                     | 290 (84.3)      | 2259 (82.4)     | 978 (81.0)      |
| Hypertension                   | 158 (47.7)      | 1449 (54.4)     | 668 (56.3)      |
| Diabetes                       | 72 (21.9)       | 742 (28.0)      | 364 (30.8)      |
| Hypercholesterolaemia          | 157 (49.5)      | 1315 (52.0)     | 568 (54.7)      |
| Smoking status                 | 115 (39.9)      | 867 (35.4)      | 433 (42.8)      |
| History of atrial fibrillation | 116 (34.8)      | 745 (27.9)      | 374 (31.4)      |
| Previous stroke                | 18 (6.0)        | 167 (6.8)       | 67 (7.0)        |
| Chronic kidney disease         | 42 (12.9)       | 410 (15.6)      | 181 (15.4)      |
| Family history of SCD          | 29 (9.0)        | 241 (9.3)       | 86 (7.3)        |
| LV ejection fraction           |                 |                 |                 |
| $\leq$ 35%                     | 217 (63.5)      | 1807 (66.1)     | 817 (68.0)      |
| 36-50%                         | 57 (16.7)       | 399 (14.6)      | 175 (14.6)      |
| $>$ 50%                        | 68 (19.9)       | 528 (19.3)      | 210 (17.5)      |
| QRS width                      |                 |                 |                 |
| $<$ 120 ms                     | 160 (47.6)      | 1398 (52.0)     | 644 (54.9)      |
| 120-150 ms                     | 72 (21.4)       | 575 (21.4)      | 230 (19.6)      |
| $>$ 150 ms                     | 104 (31.0)      | 717 (26.7)      | 298 (25.4)      |
| Previous heart failure         | 152 (76.8)      | 1088 (82.8)     | 481 (83.2)      |
| Type of device                 |                 |                 |                 |
| VR                             | 159 (46.2)      | 1237 (45.1)     | 631 (52.1)      |
| DR                             | 77 (22.4)       | 682 (24.9)      | 213 (17.6)      |
| CRT-D                          | 108 (31.4)      | 825 (30.1)      | 364 (30.1)      |
| Primary prevention             | 210 (61.0)      | 1735 (63.2)     | 818 (67.7)      |

Data are given as n (%) unless otherwise noted. CRT-D: cardiac resynchronization therapy defibrillator; LV: left ventricle; SCD: sudden cardiac death; SD: standard deviation.

**Table S2. Number of patients in whom baseline data are available.**

| <b>Baseline characteristics</b>                   | <b>Valid data, n (%)</b> |
|---------------------------------------------------|--------------------------|
| Age                                               | 4296 (100)               |
| Sex                                               | 4296 (100)               |
| Hypertension                                      | 4184 (97.4)              |
| Diabetes                                          | 4166 (97)                |
| Hypercholesterolaemia                             | 3884 (90.4)              |
| Smoking status                                    | 3752 (87.3)              |
| History of atrial fibrillation                    | 4198 (97.7)              |
| Previous stroke                                   | 3702 (86.2)              |
| Chronic kidney disease                            | 4132 (96.2)              |
| Family history of SCD                             | 4090 (95.2)              |
| LV ejection fraction                              | 4278 (99.6)              |
| QRS width                                         | 4198 (97.7)              |
| Previous heart failure                            | 4259 (99.1)              |
| Type of device                                    | 4296 (100)               |
| ICD indication (primary vs. secondary prevention) | 4296 (100)               |
| <b>ICD programming</b>                            |                          |
| Detection zones enabled                           | 4293 (99.9)              |
| VF detection interval                             | 4295 (99.9)              |
| NID within VF detection zone                      | 4295 (99.9)              |
| Fast VT detection zone enabled                    | 4293 (99.9)              |
| Fast VT detection interval*                       | 1557 (100)               |
| VT detection interval                             | 4295 (99.9)              |
| NID within VT detection zone**                    | 2440 (100)               |
| SmartShock™ Technology capable device             | 4065 (94.6%)             |

ICD: Implantable cardioverter-defibrillator; LV: left ventricle; NID: number of intervals to detect; SCD: sudden cardiac death; VF: ventricular fibrillation; VT: ventricular tachycardia.

\*Data correspond to total of patients with a fast VT zone enabled.

\*\*Data correspond to total of multizone patients.

**Table S3. Devices included in UMBRELLA study.**

| <b>Single-chamber</b>                        |                   |
|----------------------------------------------|-------------------|
| <b>Models without SmartShock® Technology</b> | <b>n</b>          |
| <b>EnTrust D154VRC</b>                       | 47                |
| <b>Maximo II VR D264VRM</b>                  | 55                |
| <b>Maximo II VR D284VRC</b>                  | 141               |
| <b>Secura VR D214VRM</b>                     | 35                |
| <b>Secura VR D234VRC</b>                     | 179               |
| <b>Virtuoso II VR D294VRC</b>                | 58                |
| <b>Virtuoso VR D164VWC</b>                   | 130               |
| <b>Subtotal</b>                              | <b>645 (29%)</b>  |
| <b>Models with SmartShock® Technology</b>    |                   |
| <b>Evera MRI S VR DVMC3D4</b>                | 234               |
| <b>Evera MRI XT VR DVMB2D4</b>               | 140               |
| <b>Evera S VR DVBC3D1</b>                    | 67                |
| <b>Evera S VR DVBC3D4</b>                    | 171               |
| <b>Evera XT VR DVBB2D1</b>                   | 42                |
| <b>Evera XT VR DVBB2D4</b>                   | 24                |
| <b>Protecta VR D364VRG</b>                   | 135               |
| <b>Protecta VR D364VRM</b>                   | 293               |
| <b>Protecta XT VR D354VRG</b>                | 115               |
| <b>Protecta XT VR D354VRM</b>                | 121               |
| <b>Visia AF MRI S VR DVFC3D4</b>             | 70                |
| <b>Visia AF MRI XT VR DVFB2D4</b>            | 102               |
| <b>Visia AF MRI™ S VR</b>                    | 5                 |
| <b>Visia AF MRI™ XT VR</b>                   | 4                 |
| <b>Visia AF S VR DVAC3D1</b>                 | 7                 |
| <b>Visia AF XT VR DVAB2D1</b>                | 12                |
| <b>Subtotal</b>                              | <b>1542 (71%)</b> |
| <b>TOTAL</b>                                 | <b>2187</b>       |

| <b>Dual-chamber</b>                          |                  |
|----------------------------------------------|------------------|
| <b>Models without SmartShock® Technology</b> | <b>n</b>         |
| <b>EnTrust D154ATG</b>                       | 20               |
| <b>Maximo II DR D264DRM</b>                  | 17               |
| <b>Maximo II DR D284DRG</b>                  | 44               |
| <b>Secura DR D214DRM</b>                     | 12               |
| <b>Secura DR D234DRG</b>                     | 103              |
| <b>Virtuoso DR D164AWG</b>                   | 57               |
| <b>Virtuoso II DR D294DRG</b>                | 55               |
| <b>Intrinsic ICD 7288</b>                    | 1                |
| <b>Subtotal</b>                              | <b>309 (30%)</b> |
| <b>Models with SmartShock® Technology</b>    | <b>n</b>         |
| <b>Evera MRI S DR DDMC3D1</b>                | 1                |
| <b>Evera MRI S DR DDMC3D4</b>                | 54               |
| <b>Evera MRI XT DR</b>                       | 7                |
| <b>Evera MRI XT DR DDMB2D4</b>               | 140              |
| <b>Evera S DR DDBC3D1</b>                    | 39               |
| <b>Evera S DR DDBC3D4</b>                    | 68               |
| <b>Evera XT DR DDBB2D1</b>                   | 38               |
| <b>Evera XT DR DDBB2D4</b>                   | 23               |
| <b>Protecta DR D364DRG</b>                   | 61               |
| <b>Protecta DR D364DRM</b>                   | 105              |
| <b>Protecta XT DR D354DRG</b>                | 93               |
| <b>Protecta XT DR D354DRM</b>                | 89               |
| <b>Subtotal</b>                              | <b>718 (70%)</b> |
| <b>TOTAL</b>                                 | <b>1027</b>      |

| <b>Cardiac Resynchronization Therapy-Defibrillators</b> |                  |
|---------------------------------------------------------|------------------|
| <b>Models without SmartShock® Technology</b>            | <b>n</b>         |
| Concerto C174AWK                                        | 63               |
| Concerto II CRT-D D294TRK                               | 28               |
| Consulta CRT-D D214TRM                                  | 60               |
| Consulta CRT-D D234TRK                                  | 194              |
| Maximo II CRT-D D264TRM                                 | 12               |
| Maximo II CRT-D D284TRK                                 | 52               |
| <b>Subtotal</b>                                         | <b>409 (29%)</b> |
| <b>Models with SmartShock® Technology</b>               | <b>n</b>         |
| Amplia MRI™ CRTD                                        | 8                |
| Amplia MRI™ Quad CRTD                                   | 20               |
| Brava CRT-D DTBC2D1                                     | 60               |
| Brava CRT-D DTBC2D4                                     | 39               |
| Brava Quad CRT-D DTBC2Q1                                | 5                |
| Brava Quad CRT-D DTBC2QQ                                | 134              |
| Claria MRI™ CRTD                                        | 17               |
| Claria MRI™ Quad CRTD                                   | 45               |
| Compia MRI™ CRTD                                        | 7                |
| Compia MRI™ Quad CRTD                                   | 13               |
| Protecta CRT-D D364TRG                                  | 46               |
| Protecta CRT-D D364TRM                                  | 72               |
| Protecta XT CRT-D D354TRG                               | 109              |
| Protecta XT CRT-D D354TRM                               | 87               |
| Viva Quad S CRT-D DTBB2Q1                               | 1                |
| Viva Quad S CRT-D DTBB2QQ                               | 27               |
| Viva Quad XT CRT-D DTBA2Q1                              | 7                |
| Viva Quad XT CRT-D DTBA2QQ                              | 171              |
| Viva S CRT-D DTBB2D1                                    | 10               |
| Viva S CRT-D DTBB2D4                                    | 10               |
| Viva XT CRT-D DTBA2D1                                   | 51               |
| Viva XT CRT-D DTBA2D4                                   | 56               |
| <b>Subtotal</b>                                         | <b>995 (71%)</b> |
| <b>TOTAL</b>                                            | <b>1404</b>      |

**Table S4. Device programming according to date of ICD implant.**

|                                       | 2005-2009<br>(N=344) | 2010-2014<br>(N=2744) | 2015-2017<br>(N=1208) | p value |
|---------------------------------------|----------------------|-----------------------|-----------------------|---------|
| Detection zones enabled               |                      |                       |                       | < 0.001 |
| • Single-zone *                       | 119 (34.6)           | 1116 (40.7)           | 618 (51.2)            |         |
| • Multi-zone                          | 225 (65.5)           | 1627 (59.3)           | 588 (48.8)            |         |
| VF detection interval, ms             | 302.7 ± 21.4         | 303.5 ± 19.2          | 301.0 ± 18.9          | 0.001   |
| NID                                   |                      |                       |                       | < 0.001 |
| • < 30/40                             | 314 (91.3)           | 1998 (72.8)           | 178 (14.6)            |         |
| • ≥ 30/40                             | 30 (8.7)             | 746 (27.2)            | 1023 (85.3)           |         |
| Fast VT detection zone enabled**      | 119 (34.6)           | 951 (34.7)            | 487 (40.4)            | 0.002   |
| Fast VT detection interval**, ms      | 270.59 ± 31.7        | 267.3 ± 31            | 263.6 ± 24.8          | 0.014   |
| VT detection interval†, ms            | 368.4 ± 31.1         | 362.4 ± 25.4          | 357.9 ± 22.4          | < 0.001 |
| NID †                                 |                      |                       |                       | < 0.001 |
| • ≤16                                 | 181 (80.4)           | 1014 (62.3)           | 200 (34.0)            |         |
| • ≥20                                 | 44 (19.6)            | 613 (37.7)            | 388 (66.0)            |         |
| SmartShock™ Technology-capable device | 40 (16.6)            | 1740 (66.4)           | 1150 (95.5)           | < 0.001 |

Data are given as n (%) or mean±standard deviation. ICD: Implantable cardioverter-defibrillator; NID: number of intervals to detect; VF: ventricular fibrillation; VT: ventricular tachycardia.

\* Patients with fast VT zone enabled through VF zone, but without any other VT zone activated were also considered as single-zone detection patients.

\*\* Through VF detection zone.

† Applies only to multi-zone detection programming patients.

**Table S5. Causes of death.**

| <b>Cause of death</b> | <b>N (%)</b>      |
|-----------------------|-------------------|
| Heart failure         | 214 (36.3%)       |
| Sudden cardiac death  | 26 (4.4%)         |
| Non-cardiovascular    | 190 (32.2%)       |
| Unknown               | 160 (27.1%)       |
| <b>Total deaths</b>   | <b>590 (100%)</b> |

**Table S6. Causes of inappropriate shock.**

| <b>Cause of inappropriate shock</b> | <b>Episodes, n (%)</b> |
|-------------------------------------|------------------------|
| Atrial fibrillation                 | 254 (42.3%)            |
| Other SVT*                          | 95 (15.9%)             |
| Non-sustained MVT                   | 52 (8.6%)              |
| T-wave oversensing                  | 95 (15.9%)             |
| Noise                               | 60 (10%)               |
| Sinus tachycardia                   | 24 (4%)                |
| False detection                     | 7 (1.2%)               |
| Possible SVT                        | 13 (2.1%)              |
| <b>Total episodes</b>               | <b>600 (100%)</b>      |

MVT: monomorphic ventricular tachycardia; SVT: supraventricular tachycardia.

\*i.e., atrial flutter, atrial tachycardia, atrioventricular node re-entry tachycardia.

**Table S7. Comparison between the UMBRELLA population and the patients enrolled in the last Spanish ICD registry.**

|                                | UMBRELLA population | Spanish ICD registry <sup>22</sup> |
|--------------------------------|---------------------|------------------------------------|
| Age (years), mean( $\pm$ SD)   | 61.9 $\pm$ 12.9     | 62.4 $\pm$ 13.5                    |
| Sex (male)                     | 82.1                | 82                                 |
| Hypertension                   | 54.4                | 57                                 |
| Diabetes                       | 28.3                | 30                                 |
| Hypercholesterolaemia          | 52.5                | 48                                 |
| Smoking status                 | 37.7                | 35                                 |
| History of atrial fibrillation | 29.4                | 27                                 |
| Previous stroke                | 6.8                 | 6                                  |
| Chronic kidney disease         | 15.3                | 15                                 |
| Family history of SCD          | 8.7                 | 9                                  |
| LV ejection fraction           |                     |                                    |
| $\leq$ 35%                     | 66.4                | 54                                 |
| 36-50%                         | 14.7                | 27.4                               |
| $>$ 50%                        | 18.9                | 18.5                               |
| QRS width                      |                     |                                    |
| $<$ 120 ms                     | 52.4                | N/R                                |
| 120-150 ms                     | 20.9                | N/R                                |
| $>$ 150 ms                     | 26.7                | N/R*                               |
| Previous heart failure         | 69.8                | N/R                                |
| Type of device                 |                     |                                    |
| VR                             | 47.2                | 50.1                               |
| DR                             | 22.6                | 13.4                               |
| CRT-D                          | 30.2                | 30.6                               |
| Primary prevention             | 64.2                | 65.7                               |
| Underlying heart disease       |                     |                                    |
| ICM                            | 50                  | 52.9                               |
| DCM                            | 27.3                | 26.1                               |
| HCM                            | 7.4                 | 7.1                                |
| ARVC                           | 1.9                 | 1.1                                |
| VHD                            | 2.8                 | 1.6                                |
| BS                             | 3.5                 | 2.3                                |
| LQTS                           | 1.1                 | 0.6                                |
| ACHD                           | 1.4                 | N/R                                |

Data are given as % unless otherwise noted. ACHD: adult congenital heart disease; ARVC: arrhythmogenic right ventricular cardiomyopathy; BS: Brugada syndrome; CRT-D: cardiac resynchronization therapy defibrillator; DCM: dilated cardiomyopathy; HCM: hypertrophic cardiomyopathy; ICD: implantable cardioverter-defibrillator; ICM: ischaemic cardiomyopathy; LQTS: long QT syndrome; LV: left ventricle; N/R: not reported; SCD: sudden cardiac death; SD: standard deviation; VHD: valvular heart disease.

\*39% of patients had QRS  $>$  140 ms.
